## 37 Introduction

38  
39 *GtACR1* is a light-gated anion channel discovered in 2015 (Govorunova *et al.*, 2015)  
40 now widely used in optogenetics as a neuron-silencing tool. *GtACR1* conducts both bromide and  
41 chloride ions effectively with higher relative permeability for the former substrate (Govorunova  
42 *et al.*, 2015). We and the group of Karl Deisseroth independently determined X-ray crystal  
43 structures of the dark (closed) form of *GtACR1* homodimer at 2.9 Å (Kim *et al.*, 2018; Li *et al.*,  
44 2019). We proposed that the conductance pathway was attributable to a full-length  
45 intramolecular tunnel traversing each protomer from the extracellular side to the intracellular  
46 side of the membrane lined by mostly hydrophobic residues (Li *et al.*, 2019). Current  
47 rectification by charges introduced inside but not outside the tunnel support our hypothesis that  
48 the tunnel serves as the anion-conducting path upon photoactivation (Sineshchekov *et al.*, 2019).  
49 However, no substrate was found in either structure (Kim *et al.*, 2018; Li *et al.*, 2019; Li *et al.*,  
50 2019) despite the presence of chloride in the crystallization conditions. The mechanism of anion  
51 conductance is still elusive.

52 In the apo form (i.e. without anion substrate) (Li *et al.*, 2019) the tunnel is narrowed by 3  
53 constrictions blocking ion permeation: C1 in the extracellular half, C2 mid-membrane consisting  
54 of the photoactive retinylidene Schiff base and interacting residues, and C3 in the cytoplasmic  
55 half. In our model, retinal photoisomerization at C2 needs to open all three of these gates to form  
56 a conductive anion channel through the protein. However, structural changes at the two  
57 constrictions, C1 and C3, which are located on each side of the Schiff base, and their roles in the  
58 channel gating mechanism are unclear.

59 To address these questions, here we report the crystal structure of bromide-bound  
60 *GtACR1*. The structure in bromide provides direct evidence for our proposed conductance  
61 mechanism (Li *et al.*, 2019) and also demonstrates protein conformational changes in C1 and C3,  
62 which shed light into the role of the constrictions in channel opening.

63

## 64 Results and Discussion

65

### 66 Overall structure of bromide-bound *GtACR1*

67 To facilitate incorporation of bromide, 100 mM NaBr was supplied in both protein  
68 purification and crystallization buffers. To avoid radiation damage, the *in meso in situ* serial data  
69 collection method (IMISX) (Huang *et al.*, 2018) was used. The structure of bromide-bound  
70 *GtACR1* was determined at 3.2 Å resolution with merging 36 partial data sets by molecular  
71 replacement (MR) using the apo form structure (PDB code 6EDQ) as the model (Table 1).

72 The bromide-bound *GtACR1* exhibits a similar homodimeric overall structure as the apo  
73 form (rmsd: 0.6 Å by comparing C $\alpha$  from residues 1-295) (Fig. 1A). All 7-helices and trans-  
74 configured retinal moieties are well superimposed including the inter-subunit disulfide bridge  
75 stabilizing the N-terminus fragments of the two protomers on the extracellular surface. Each  
76 protomer exhibits a continuous tunnel extending from the extracellular to intracellular surfaces of  
77 the protein similar to that seen in the apo form structure (Fig. 1A and 1B).

78 As seen from comparison of the tunnel profile diameters of the apo and bromide bound  
79 structures (Fig. 1B) bromide binding enlarges the tunnel in constriction C3 on the cytoplasmic

80 side of the tunnel, where it is bound (Fig. 1A), and also in part of C2, adjacent to the binding site,  
81 and the more distant constriction C1 on the extracellular side of the tunnel. The widened  
82 constriction regions indicate a preactivated conformation exhibiting a closed channel with  
83 fractional transition to an open-channel state.

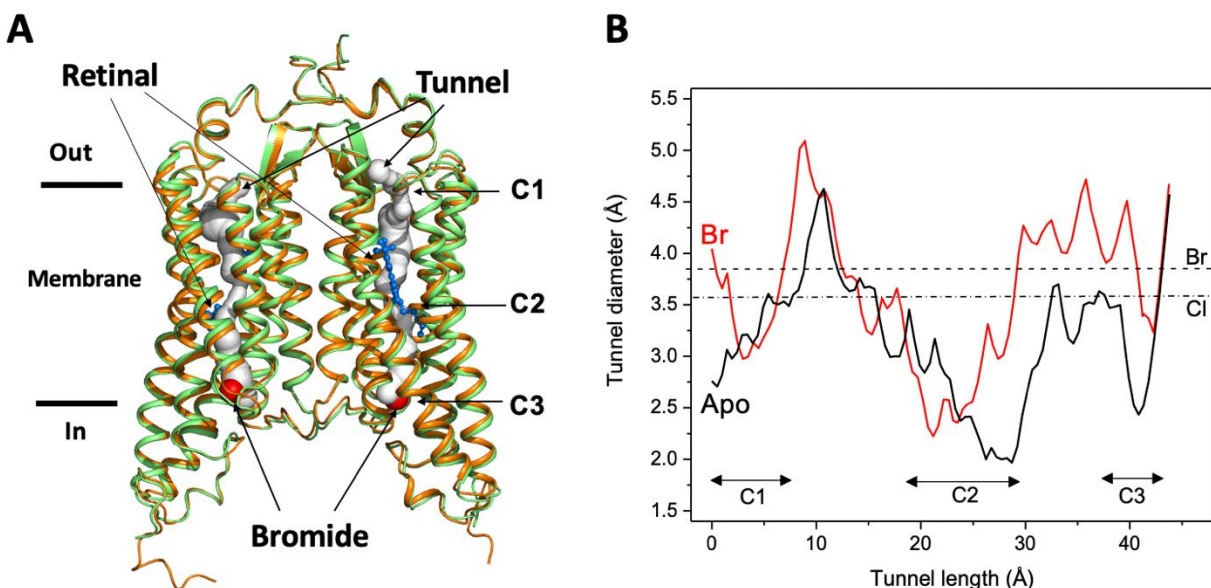

84  
85 **Figure 1. Overall conformation of the bromide-bound *GtACR1* structure.** A: Superimposition of  
86 *GtACR1* apo (orange, PDB 6EDQ) and bromide-bound (green) structures; one bromide ion (red sphere)  
87 is located at the cytoplasmic entry of the intramembrane tunnel (grey tube, predicted using the program  
88 CAVER (Chovanova et al., 2012) of each protomer. All-trans-retinal moieties are depicted as blue  
89 sticks. B: Tunnel profile of *GtACR1* protomer B predicted by CAVER: *GtACR1* apo form (black line);  
90 bromide-bound form (red line). The sizes of chloride and bromide ions are indicated as dot-dashed and  
91 dashed lines, respectively.

92

### 93 **Bromide binding at the tunnel entry**

94 A bromide ion was found at the cytoplasmic port of the tunnel in each protomer (Fig. 1A  
95 & Suppl. Fig. 1A). *A priori*, given the larger number of electrons in Br ( $Z=35$ ), it would be  
96 difficult to mistake it for a water molecule ( $Z=10$ ), but to test this possibility directly, the  
97 bromide ion was replaced with a water molecule and the structure refined using *PHENIX* (Adams  
98 et al., 2010). The refinement showed a strong positive electron density at the bromide position in  
99 the  $F_o-F_c$  difference map and it was diminished only when a bromide ion was placed at that  
100 position (Suppl. Fig. 1B). This evidence excludes a water molecule as responsible for the  
101 electron density at the position. We conclude a bromide ion resides at the tunnel entry in each  
102 protomer.

103 The bromide binding site is formed by three cyclic residues: Pro58 from the cytoplasmic  
104 loop between TM1 and 2, and Trp246 and Trp250 from TM7 in a triangular configuration (Fig.  
105 2A). In the binding site, a bromide is stabilized by a H-bond interaction formed by the indole NH  
106 group of Trp246. This type of anion binding conformation has also been found in several  
107 chloride-bound nucleotide structures (Auffinger et al., 2004). Pro58 may play an important role  
108 in substrate binding by pressing its ring towards the bromide anion with a short distance of 2.4

109 Å. Unlike other aromatic residues, the ring of proline exhibits a partial positive charge due to  
110 electron withdrawal by the adjacent protein backbone and the lower electronegativity of the  
111 hydrogens on the ring surface (Zondlo, 2013). The partial electropositivity of Pro58 may  
112 contribute to the binding of bromide via electrostatic interactions. Notably, such a close proline-  
113 halide interaction has also been observed in the structure of the chloride-pump rhodopsin CIR  
114 (site 2) (Kim *et al.*, 2016).  
115

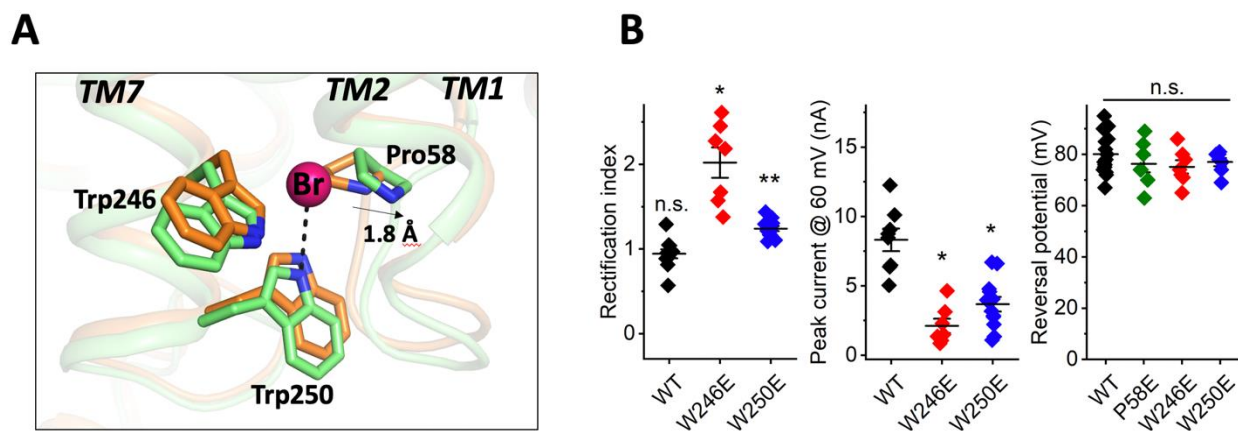

116  
117 **Figure 2. Structure of the bromide binding site in the apo and bromide-bound GtACR1 and**  
118 **electrophysiological properties of site mutants. A:** A bromide ion (red sphere) stabilized by three  
119 cyclic residues (green sticks) via H-bond interaction (black dashed line) with superimposition of the apo  
120 form structure (orange). **B:** Functional probing of the bromide binding site residues by patch clamp  
121 analysis of their mutants: *Left:* Rectification index (RI), defined as the ratio of peak photocurrent  
122 amplitudes recorded at + 60 and - 60 mV at the amplifier output. RI > 1 by one-sample Wilcoxon signed-  
123 rank test: \* p < 0.05, \*\* p < 0.01, n.s. not significant (p > 0.05). *Middle:* Peak current at 60 mV.  
124 Comparison with the wild-type by Mann-Whitney test: \* p < 0.005. *Right:* Reversal potential at the  
125 reduced Cl<sup>-</sup> concentration in the bath. Comparison with the wild-type by Mann-Whitney test: n.s., not  
126 significant (p > 0.05).

127  
128 Our previous results implicated Pro58 in gating of GtACR1, in that substitution of Pro58  
129 by Glu reduced photocurrent amplitude, altered the kinetics of channel closing, and caused  
130 strong outward rectification of the current-voltage dependence (Li *et al.*, 2019; Sineshchekov *et*  
131 *al.*, 2019). We observed similar effects in W246E and W250E mutants in the bromide binding  
132 site (Fig. 2B), in that photocurrent amplitudes were significantly reduced compared to the wild  
133 type and outward rectification was increased (Fig. 2B). None of these three substitutions with  
134 Glu reduced the selectivity for anions, as assessed by reversal potential measurements (Fig. 2B).  
135

### 136 Conformational changes of the C1 and C3 constrictions

137 Despite the similar overall structure to that of the apo form, conformational changes were  
138 observed at the C1 and C3 constrictions within the tunnel. Pro58 is an important component of  
139 C3. In the apo form structure, Pro58, together with Leu108, Ala61, and Leu245, constrain the  
140 cytoplasmic port, leading to the cytoplasmic half of the tunnel narrowing to 3.6 Å in diameter (Li  
141 *et al.*, 2019). In the bromide-bound structure, the presence of bromide pushes Pro58 outward by



142 ~2 Å (Fig. 2A). As a result, the cytoplasmic half of the tunnel is broadened by 1 Å in diameter  
143 (Fig. 1B).

144 Conformational changes were also observed in the extracellular half of the tunnel. In the  
145 apo form structure, the C1 constriction is stabilized by a salt-bridge formed by Arg94 and  
146 Glu223 near the extracellular surface (Fig. 3A). In the bromide-bound structure, Arg94  
147 undergoes salt-bridge switching along the tunnel. The side-chain of Arg94 is flipped by ~180° to  
148 form an alternative salt-bridge with Asp234 in the photoactive site (Fig. 3A), resulting in modest  
149 relaxation (~1 Å in diameter) of the C1 constriction (Fig. 1B).

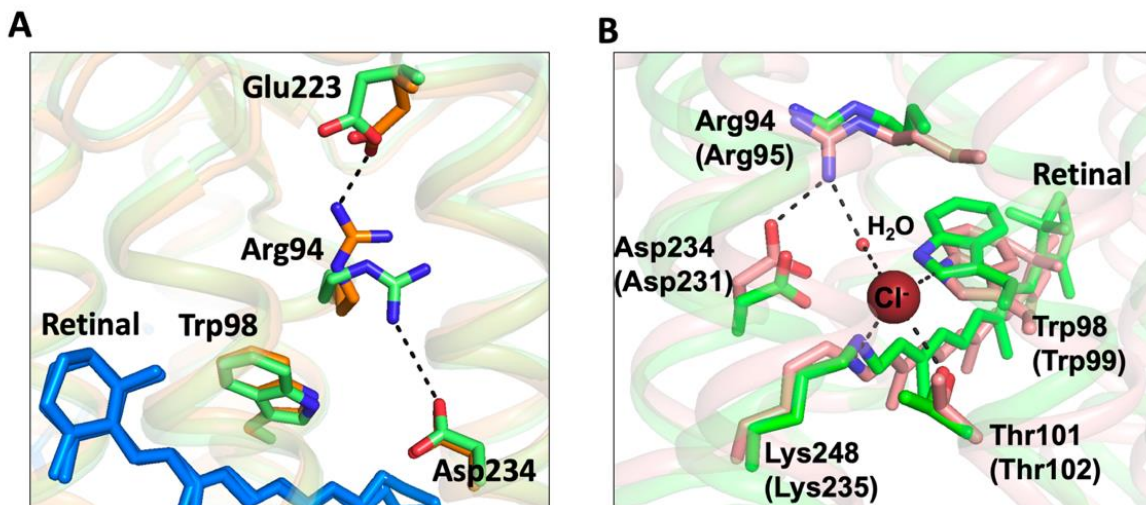

150  
151 **Figure 3. Conformational changes of the C1 constriction.** **A:** Superimposition of *GtACR1* apo form  
152 (*orange*) and bromide-bound (*green*) structures showing salt-bridge switching (*black dashed lines*) of  
153 Arg94 from the extracellular Asp223 to Asp234 near the mid-membrane retinal (*blue sticks*). **B:**  
154 Superimposition of the bromide-bound *GtACR1* (*green*) and Cl-pump CIR (*pink*, PDB 5G2A) structures  
155 showing a similar halide binding site in the extracellular half of the tunnel. In the CIR structure, a chloride  
156 ion (*maroon sphere*) is stabilized via H-bond interactions (*black dashed lines*). The residues are labelled  
157 as in *GtACR1* and analogous residues for CIR are indicated in parentheses.

158  
159 Arg94 is highly conserved in the microbial rhodopsin family and it is critical in  
160 maintaining anion conductance of *GtACR1*. The mutation R94A nearly abolished anion  
161 conductance (*Li et al., 2019*). Arg94 is the only positively-charged residue in the extracellular  
162 half of the tunnel. It may enable transfer of anions across the extracellular half of the tunnel via  
163 charge-charge interaction. We found that this side chain rotation enables Arg94 and its  
164 neighboring residues to form a conformation nearly identical to the chloride binding site of the  
165 Cl-pump CIR (*Kim et al., 2016*) (Fig. 3B). In the structure of CIR, a chloride ion (site 1) is bound  
166 between Arg95 and the Schiff base via salt-bridges. Although some densities were also observed  
167 near Arg94 in bromide-bound *GtACR1*, those weak densities prevent unambiguous  
168 determination of any halide anion in the vicinity. However, the similar conformations (Fig. 3B)  
169 suggest that Arg94 rotates its side chain to form a functional anion binding site with the Schiff  
170 base in *GtACR1*.

171

## 172 Conclusion

173 In this research advance, we addressed several major questions raised by our previous  
174 apo form structure by determining the crystal structure of bromide-bound *GtACR1*. We  
175 identified a novel bromide binding site at the cytoplasmic entry of the transmembrane tunnel (Fig.  
176 1). This finding provides direct evidence for our hypothesis (*Li et al., 2019*) that the tunnel we  
177 observe both in the apo form and, in an altered form, in the bromide-bound condition is the  
178 closed anion channel. The structure shows protein conformational changes induced by bromide  
179 binding that widen the tunnel: (1) bromide binding at the cytoplasmic entry induces relaxation of  
180 the C3 constriction (Fig. 2A); and (2) salt-bridge switching of Arg94 may create an anion  
181 binding site with the protonated Schiff base (Fig. 3A & 3B). These observations indicate that  
182 substrate binding induces a transition from an inactivated state to a pre-activated state in the dark.  
183 Despite the conformational changes that expand the tunnel in C1 and C3, the narrowest  
184 constriction C2 remains tightly closed (Fig. 1B), which is attributable to the all-*trans*-configured  
185 retinal moiety within the tunnel. These results suggest a dominant role of the photoactive site  
186 Schiff base *per se* in the channel-gating mechanism. Moreover, the pre-activating conformational  
187 changes induced by bromide binding may facilitate channel opening by reducing free energy in  
188 the tunnel constrictions, consistent with the larger conductance of bromide vs chloride  
189 (*Govorunova et al., 2015*). Future structural study of *GtACR1* in light-activated states is needed  
190 to resolve protein conformational changes in its photochemical reaction cycle.

191

## 192 Methods

### 193 *Protein expression and purification*

194 Protein expression and purification of *GtACR1* expressed in *Pichia pastoris* followed the  
195 procedure described (*Li et al., 2019*). The eluted protein was further purified using a Superdex  
196 Increase 10/300 GL column (GE Healthcare, Chicago, IL) equilibrated with buffer containing  
197 350 mM NaBr, 5% glycerol, 0.03% DDM, 20 mM MES, pH 5.5, thereby replacing Cl<sup>-</sup> with Br<sup>-</sup>  
198 in the micelle suspension. Protein fractions with an A280/A515 absorbance ratio of ~1.9 were  
199 pooled, concentrated to ~20 mg/ml using a 100 K MWCO filter, flash-frozen in liquid nitrogen,  
200 and stored at -80°C until use. Molar protein concentration was calculated using the absorbance  
201 value at 515 nm divided by the extinction coefficient 45,000 M<sup>-1</sup>cm<sup>-1</sup>.

### 202 *Protein crystallization*

203 Crystallization was carried out using the *in meso* method as with the apo protein (*Li et*  
204 *al., 2019*). The lipidic mesophase (lipidic cubic phase, LCP) sample was obtained by mixing 40  
205 µl of *GtACR1* protein with 60 µl monoolein (MO) (Sigma, St. Louis, MO or Nu-chek,  
206 Waterville, MN) using two syringes until the mixture became transparent. Crystallization trials  
207 were setup using both 96-well LCP glass sandwich plates (Molecular Dimensions, Maumee OH)  
208 and IMISX™ plates (MiTeGen) which are designed to perform *in meso in situ* serial X-ray  
209 crystallography (*Huang et al., 2018; Huang et al., 2016*) with 150 nl aliquots of the protein-  
210 mesophase mixture and overlaid with 1.5 µl of precipitant solution using a Gryphon  
211 crystallization robot (Art Robbins, Sunnyvale, CA). The plates were covered by aluminum foil to  
212 maintain a dark environment and incubated at room temperature. Red-colored *GtACR1* crystals  
213 of ~20 µm in size appeared after one month. The most highly diffracting crystals were obtained  
214 from crystallization screen containing 15% 2-methyl-2,4-pentanediol (MPD), 0.1 M NaBr and

215 buffer of 0.1 M MES, pH 5.5, or Na-acetate, pH 5.5. LCP crystals from glass plate were  
216 harvested using micromesh loops (MiTeGen, Ithaca, NY) and the wells with crystals-laden LCP  
217 in IMISX plate were retrieved using a glass cutter and scissors and mounted using 3D-printed  
218 holders (Huang *et al.*, 2020). All the samples were flash-cooled in liquid nitrogen without any  
219 additional cryoprotectant and stored in uni-pucks (MiTeGen, Ithaca, NY) for X-ray diffraction.  
220 An improvement over our previous work was setting up the crystallization in the IMISX™ plates  
221 and shipping the plates to PSI. This step prevents potential damage to the crystals during  
222 harvesting and facilitates high-throughput screening for diffractable crystals.

### 223 ***Data collection and processing***

224 X-ray diffraction data collections were performed on protein crystallography beamlines  
225 X06SA-PXI at the Swiss Light Source (SLS), Villigen, Switzerland. Data were collected with a  
226  $10 \times 10 \mu\text{m}^2$  micro-focused X-ray beam of 13.49 keV (0.91882 Å in wavelength) at 100 K using  
227 SLS data acquisition software suites (DA+) (Wojdyla *et al.*, 2018). Continuous grid-scans  
228 (Wojdyla *et al.*, 2018) were used to locate crystals in frozen LCP samples both from  
229 conventional loop and IMISX samples (Huang *et al.*, 2016). The crystals harvested on loop were  
230 collected by the rotation method with 0.2 s exposure time,  $0.2^\circ$  oscillation for data collection and  
231  $30^\circ$  wedge for each crystals. The sample using IMISX setup were measured by an automated  
232 serial data collection protocol (CY+) as described (Basu *et al.*, 2019) using the following  
233 parameters:  $0.2^\circ$  oscillation and 0.1 s exposure time for data collection with  $10\text{-}20^\circ$  wedge for  
234 each crystal. The EIGER 16M detector operated in continuous/shutterless data collection mode.  
235 Data were processed with XDS and scaled and merged with XSCALE (Kabsch, 2010a; Kabsch,  
236 2010b). The data sets were further selected to improve the final merging data set with the  
237 XDSCC12 (Assmann *et al.*, 2020). 36 partial data sets were collected, processed, and merged to a  
238 final data set to 3.2 Å resolution, in which 31 data sets were collected on the crystals in the  
239 IMISX setup and 5 data sets were collected from crystals harvested on loop. Data collection and  
240 processing statistics are provided in Table 1.

### 241 ***Structure determination and analysis***

242 The structure of bromide-bound GtACR1 was determined by the molecular replacement  
243 (MR) method using 6EDQ (Li *et al.*, 2019) as the search model with the program Phaser (McCoy  
244 *et al.*, 2007). The structure was refined using PHENIX (Adams *et al.*, 2010) and model building  
245 was completed manually using COOT (Emsley and Cowtan, 2004). The final structure yields a  
246  $R_{\text{work}}/R_{\text{free}}$  factor of 0.26/0.29. Refinement statistics are reported in Table 1. The structure factors  
247 and coordinates have been deposited in the Protein Data Bank (PDB entry code: 7L1E). Figures  
248 of molecular structures were generated with PyMOL (<http://www.pymol.org>). We analyzed the  
249 halide tunnel using the program CAVER with 0.9 nm as the detecting probe (Chovancova *et al.*,  
250 2012).

### 251 ***Electrophysiology of GtACR1 mutants***

252 GtACR1 mutants were characterized by whole-cell patch clamp recording as described in  
253 detail in our previous report (Li *et al.*, 2019). Briefly, the wild-type expression construct was  
254 cloned into the mammalian expression vector pcDNA3.1 (Life Technologies, Carlsbad, CA) in  
255 frame with an EYFP (enhanced yellow fluorescent protein). Mutations were introduced using a  
256 QuikChange XL site-directed mutagenesis kit (Agilent Technologies, Santa Clara, CA) and  
257 verified by DNA sequencing. HEK293 (human embryonic kidney) cells were transfected using  
258 the ScreenFectA transfection reagent (Waco Chemicals USA, Richmond, VA). All-trans-retinal

259 (Sigma, St. Louis, MO) was added at the final concentration 4  $\mu\text{M}$  immediately after  
260 transfection. Photocurrents were recorded 48-72 h after transfection in whole-cell voltage clamp  
261 mode at room temperature (25°C) with an Axopatch 200B amplifier (Molecular Devices, Union  
262 City, CA) and digitized with a Digidata 1440A using pClamp 10 software (both from Molecular  
263 Devices). Patch pipettes were fabricated from borosilicate glass and filled with the following  
264 solution (in mM): KCl 126, MgCl<sub>2</sub> 2, CaCl<sub>2</sub> 0.5, EGTA 5, HEPES 25, and pH 7.4. The standard  
265 bath solution contained (in mM): NaCl 150, CaCl<sub>2</sub> 1.8, MgCl<sub>2</sub> 1, glucose 5, HEPES 10, pH 7.4.  
266 To test for changes in the permeability for Cl<sup>-</sup>, this ion in the bath was partially replaced with  
267 non-permeable aspartate (the final Cl<sup>-</sup> concentration 5.6 mM). For each cell, a single value of the  
268 E<sub>rev</sub> was calculated. The holding potential values were corrected for liquid junction potentials  
269 calculated using the Clampex built-in LJP calculator. Continuous light pulses were provided by a  
270 Polychrome V light source (T.I.L.L. Photonics GMBH, Grafelfing, Germany) at 15 nm half-  
271 bandwidth in combination with a mechanical shutter (Uniblitz Model LS6, Vincent Associates,  
272 Rochester, NY; half-opening time 0.5 ms). The maximal light intensity at the focal plane of the  
273 objective lens was 7.7 mW mm<sup>-2</sup> at 515 nm.

274 Batches of culture were randomly allocated for transfection with a specific mutant; no  
275 masking (blinding) was used. Individual transfected HEK293 cells were selected for patching by  
276 inspecting their tag fluorescence; non-fluorescent cells were excluded, as were cells for which  
277 we could not establish a gigaohm seal. Results obtained from different individual cells were  
278 considered as biological replicates. The raw data obtained in individual cells are shown as  
279 diamonds. Sample size was estimated from previous experience and published work on a similar  
280 subject, as recommended by the NIH guidelines. No outliers were excluded. Normality of the  
281 data was not assumed, and therefore non-parametric statistical tests were used as implemented in  
282 OriginPro 2016 software; P values > 0.05 were considered not significant.

### 283 **Cell lines**

284 Only a commercially available cell line authenticated by the vendor (HEK293 from  
285 ATCC) was used; no cell lines from the list of commonly misidentified cell lines were used. The  
286 absence of micoplasma contamination was verified by Visual-PCR mycoplasma detection kit  
287 (GM Biosciences, Frederick, MD).

### 289 **Acknowledgements**

290 This work was supported by National Institutes of Health Grant R01GM027750 and Endowed  
291 Chair AU-0009 from the Robert A. Welch Foundation to JLS, and American Heart Association  
292 Grant 18TPA34230046 to LZ. C-YH was partially supported by the European Union's Horizon  
293 2020 research and innovation programme under the Marie-Skłodowska-Curie grant agreement  
294 No. 701647. The authors thank Yumei Wang for her technical assistance and the assistance and  
295 support of beamline scientists at the Swiss Light Source beamlines X06SA-PXI.

296

297

### 298 **Competing interests**

299 JLS, OAS, and EGG as inventors and The University of Texas Health Science Center at  
300 Houston have been granted a patent titled: Compositions and Methods for Use of Anion  
301 Channel Rhodopsins. The other authors declare no competing interests.



302  
303  
304  
305

306

307 **Table 1. Crystallographic data and refinement of the bromide-bound *Gt*ACR1 structure\***

| PDB ID                                              | 7L1E*                    |
|-----------------------------------------------------|--------------------------|
| Space group                                         | $P 2_1$                  |
| a, b, c (Å)                                         | 61.66, 77.64, 73.63      |
| $\alpha$ , $\beta$ , $\gamma$ (°)                   | 90, 95.59, 90            |
| Beamline                                            | SLS-X06SA                |
| Wavelength (Å)                                      | 0.91882                  |
| Resolution (Å)                                      | 48.15-3.20 (3.28-3.20)** |
| <i>R</i> <sub>meas</sub>                            | 0.56 (2.81)              |
| I / $\sigma$ (I)                                    | 2.84 (0.54)              |
| Completeness (%)                                    | 95.6 (96.0)              |
| Multiplicity                                        | 4.84 (3.31)              |
| CC1/2 (%)                                           | 97.5 (13.4)              |
| Refinement                                          |                          |
| Resolution (Å)                                      | 41.73-3.2 (3.28-3.20)    |
| No. of unique reflections                           | 11054 (800)              |
| <i>R</i> <sub>work</sub> / <i>R</i> <sub>free</sub> | 0.27/0.29                |
| R.m.s. deviations                                   |                          |
| Bond lengths (Å)                                    | 0.004                    |
| Bond angles (°)                                     | 0.964                    |
| B-factor                                            |                          |
| Proteins                                            | 51.05                    |
| Ligands                                             | 54.84                    |
| H <sub>2</sub> O                                    | 50.30                    |
| Ramachandran Plot                                   |                          |
| Favored (%)                                         | 96.37                    |
| Allowed (%)                                         | 3.63                     |
| MolProbity<br>Clash score                           | 14.88                    |

\* Data processing and refinement statistics are reported with Friedel pairs merged.

\*\* Values in parentheses are for the highest resolution shell.

308

309

310

311

312

313

314

315  
316  
317  
318  
319  
320  
321  
322  
323  
324  
325  
326  
327  
328  
329  
330  
331  
332  
333  
334  
335  
336  
337  
338  
339  
340  
341  
342  
343  
344  
345  
346  
347  
348  
349  
350  
351  
352  
353  
354  
355  
356  
357  
358

## References

- Adams, P.D., P.V. Afonine, G. Bunkoczi, V.B. Chen, I.W. Davis, N. Echols, J.J. Headd, L.W. Hung, G.J. Kapral, R.W. Grosse-Kunstleve, A.J. McCoy, N.W. Moriarty, R. Oeffner, R.J. Read, D.C. Richardson, J.S. Richardson, T.C. Terwilliger, and P.H. Zwart. 2010. PHENIX: a comprehensive Python-based system for macromolecular structure solution. *Acta Crystallogr D Biol Crystallogr.* 66:213-221.
- Assmann, G.M., M. Wang, and K. Diederichs. 2020. Making a difference in multi-data-set crystallography: simple and deterministic data-scaling/selection methods. *Acta Crystallogr D Struct Biol.* 76:636-652.
- Auffinger, P., L. Bielecki, and E. Westhof. 2004. Anion Binding to Nucleic Acids. *Structure (London, England : 1993).* 12:379-388.
- Basu, S., J.W. Kaminski, E. Panepucci, C.Y. Huang, R. Warshamanage, M. Wang, and J.A. Wojdyla. 2019. Automated data collection and real-time data analysis suite for serial synchrotron crystallography. *J Synchrotron Radiat.* 26:244-252.
- Chovancova, E., A. Pavelka, P. Benes, O. Strnad, J. Brezovsky, B. Kozlikova, A. Gora, V. Sustr, M. Klvana, P. Medek, L. Biedermannova, J. Sochor, and J. Damborsky. 2012. CAVER 3.0: a tool for the analysis of transport pathways in dynamic protein structures. *PLoS Comput Biol.* 8:e1002708.
- Emsley, P., and K. Cowtan. 2004. Coot: model-building tools for molecular graphics. *Acta Crystallogr D Biol Crystallogr.* 60:2126-2132.
- Govorunova, E.G., O.A. Sineshchekov, R. Janz, X. Liu, and J.L. Spudich. 2015. Natural light-gated anion channels: A family of microbial rhodopsins for advanced optogenetics. *Science.* 349:647-650.
- Huang, C.Y., N. Meier, M. Caffrey, M. Wang, and V. Olieric. 2020. 3D-printed holders for in meso in situ fixed-target serial X-ray crystallography. *J Appl Crystallogr.* 53:854-859.
- Huang, C.Y., V. Olieric, N. Howe, R. Warshamanage, T. Weinert, E. Panepucci, L. Vogeley, S. Basu, K. Diederichs, M. Caffrey, and M. Wang. 2018. In situ serial crystallography for rapid de novo membrane protein structure determination. *Commun Biol.* 1:124.
- Huang, C.Y., V. Olieric, P. Ma, N. Howe, L. Vogeley, X. Liu, R. Warshamanage, T. Weinert, E. Panepucci, B. Kobilka, K. Diederichs, M. Wang, and M. Caffrey. 2016. In meso in situ serial X-ray crystallography of soluble and membrane proteins at cryogenic temperatures. *Acta crystallographica. Section D, Structural biology.* 72:93-112.
- Kabsch, W. 2010a. Integration, scaling, space-group assignment and post-refinement. *Acta Crystallogr D Biol Crystallogr.* 66:133-144.
- Kabsch, W. 2010b. Xds. *Acta Crystallogr D Biol Crystallogr.* 66:125-132.
- Kim, K., S.K. Kwon, S.H. Jun, J.S. Cha, H. Kim, W. Lee, J.F. Kim, and H.S. Cho. 2016. Crystal structure and functional characterization of a light-driven chloride pump having an NTQ motif. *Nat Commun.* 7:12677.
- Kim, Y.S., H.E. Kato, K. Yamashita, S. Ito, K. Inoue, C. Ramakrishnan, L.E. Fenno, K.E. Evans, J.M. Paggi, R.O. Dror, H. Kandori, B.K. Kobilka, and K. Deisseroth. 2018. Crystal structure of the natural anion-conducting channelrhodopsin GtACR1. *Nature.* 561:343-348.

359 Li, H., C.-Y. Huang, E.G. Govorunova, C.T. Schafer, O.A. Sineshchekov, M. Wang, L. Zheng,  
360 and J.L. Spudich. 2019. Crystal structure of a natural light-gated anion channelrhodopsin.  
361 *eLife*. 8:e41741.  
362 McCoy, A.J., R.W. Grosse-Kunstleve, P.D. Adams, M.D. Winn, L.C. Storoni, and R.J. Read.  
363 2007. Phaser crystallographic software. *J Appl Crystallogr*. 40:658-674.  
364 Sineshchekov, O.A., E.G. Govorunova, H. Li, X. Wang, and J.L. Spudich. 2019. Opposite  
365 Charge Movements Within the Photoactive Site Modulate Two-Step Channel Closing in  
366 GtACR1. *Biophys J*. 117:2034-2040.  
367 Wojdyla, J.A., J.W. Kaminski, E. Panepucci, S. Ebner, X. Wang, J. Gabadinho, and M. Wang.  
368 2018. DA+ data acquisition and analysis software at the Swiss Light Source  
369 macromolecular crystallography beamlines. *J Synchrotron Radiat*. 25:293-303.  
370 Zondlo, N.J. 2013. Aromatic-proline interactions: electronically tunable CH/ $\pi$  interactions. *Acc*  
371 *Chem Res*. 46:1039-1049.

372

373

374 **Supplementary Figure 1.** Confirmation of a bromide ion at the cytoplasmic port of GtACR1.  
375 **A:** Bromide ion (dark red sphere) in the binding site (grey sticks) overlaid with the composite  
376 omit map depicted as magenta mesh (contoured at  $2\sigma$ ). The composite omit map was calculated  
377 using PHENIX (Adams *et al.*, 2010). **B:**  $F_o - F_c$  difference map generated by the refinement of a  
378 water molecule at the bromide position showing positive electron density depicted as green mesh  
379 (contoured at  $+3\sigma$ ) at the water position.

**A**

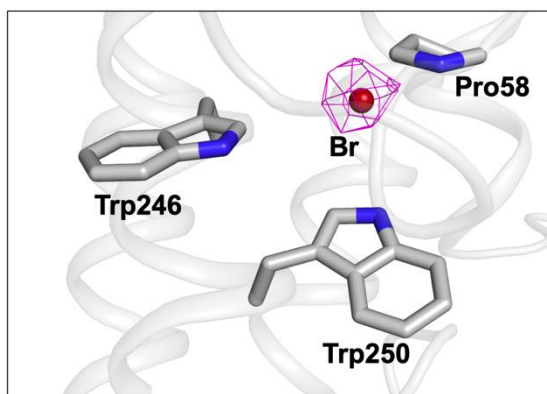

**B**

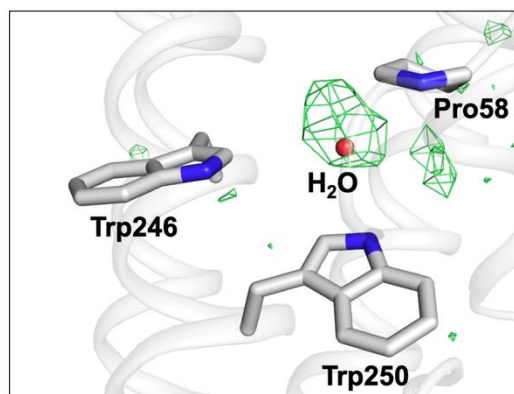

380

381
